# Supplementary material for: Frequency of Cervical Nodal Metastasis in Early-Stage Squamous Cell Carcinoma of the Tongue
Source: PubMed Central journal article supplement — Int Arch Otorhinolaryngol. 2017 Jun 6;22(2):136–40. doi: 10.1055/s-0037-1603626 (PMC5882373; doi:10.1055/s-0037-1603626), 2017-06-06
Supplement: 10-1055-s-0037-1603626-s0564.pdf [file 10-1055-s-0037-1603626-s0564.pdf]

# Appendix I

MR. Number: \_\_\_\_\_

Sex: M / F

Name of Procedure: \_\_\_\_\_

Date of procedure: \_\_\_\_\_

Grade of tumor: well / moderate / poor

T stage of tumor: T1 / T2

Tumor thickness (mm): \_\_\_\_\_

**Notes:**

Presence of neck node metastasis: Yes/No

Date: \_\_\_\_\_

Case # \_\_\_\_\_
